# Supplementary material
Source: PubMed Central journal article supplement (PMC5443385)
Supplement: khvi-13-05-1268745-s001.pdf [file khvi-13-05-1268745-s001.pdf]

## Supplementary Figure 1.

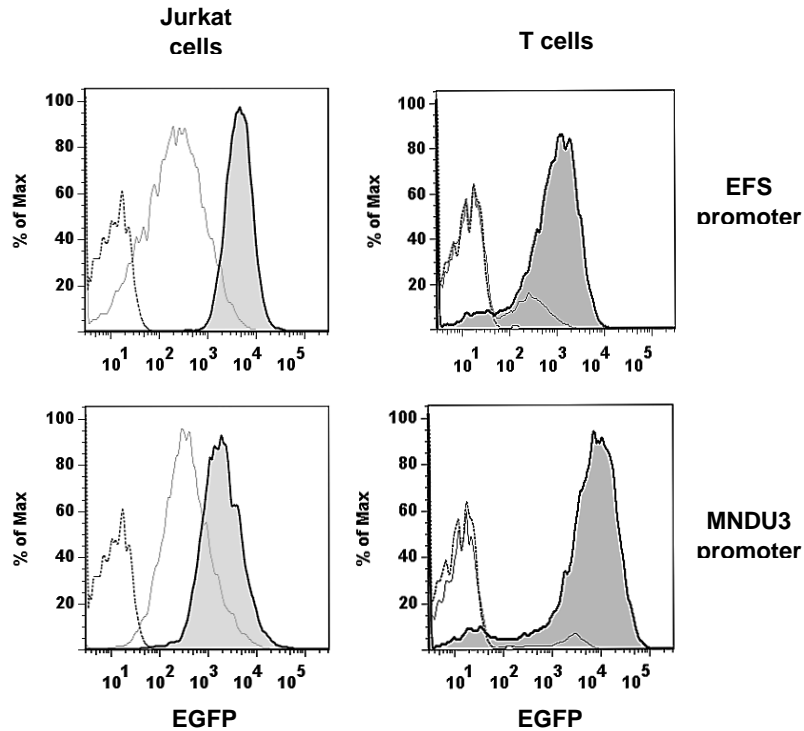

**Supplementary Figure 1.** Representative histogram plots of expression of EGFP in gene-modified Jurkat cell line (panels at left) and primary human T cells (panels at right), with lentiviral constructs carrying the promoters EFS (upper panels) or MNDU3 (lower panels). Dotted lines represent non-transduced cells; hairline non-tinted histograms represent cells transduced with lentiviral vectors at 10<sup>5</sup> TU/mL; tinted histograms represent cells transduced with lentiviral vectors at 10<sup>7</sup> TU/mL.
